# Supplementary material for: Selective regulation of YB-1 mRNA translation by the mTOR signaling pathway is not mediated by 4E-binding protein
Source: PubMed Central journal article supplement (PMC4773878; doi:10.1038/srep22502), 2016-03-02
Supplement: srep22502-s1.pdf [file srep22502-s1.pdf]

## Supplementary Information

Selective regulation of YB-1 mRNA translation by the mTOR signaling pathway is not mediated by 4E-binding protein

Lyabin D.N<sup>1\*</sup>. and Ovchinnikov L.P<sup>1</sup>.

<sup>1</sup>Institute of Protein Research, Russian Academy of Sciences, Pushchino, 142290, Russian Federation

\*corresponding author, lyabin@vega.protres.ru

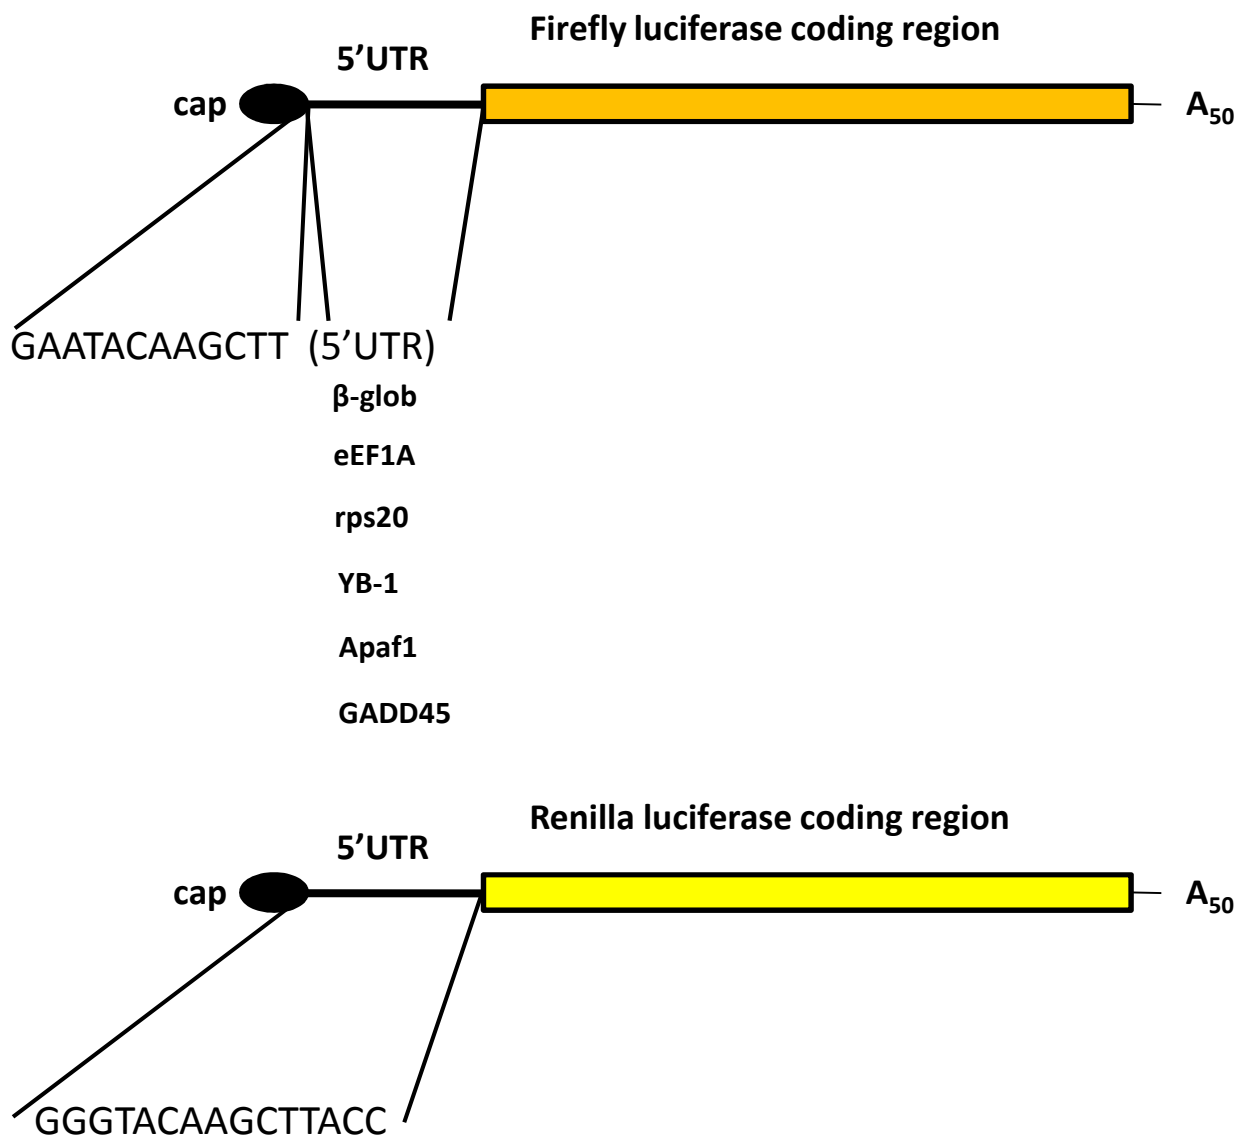

**Supplementary figure 1.**

A scheme of reporter mRNAs used in experiment.
